# Supplementary material for: Frequent NRG1 fusions in Caucasian pulmonary mucinous adenocarcinoma predicted by Phospho-ErbB3 expression
Source: PubMed Central journal article supplement (PMC5839392; doi:10.18632/oncotarget.23800), 2018-01-03
Supplement: oncotarget-09-9661-s001.pdf [file oncotarget-09-9661-s001.pdf]

## Frequent *NRG1* fusions in caucasian pulmonary mucinous adenocarcinoma predicted by phospho-erbb3 expression

### SUPPLEMENTARY MATERIALS

**Supplementary Table 1: Monoclonal antibodies used for immunohistochemical profiling of lung cancer cohort**

| Antibody                       | Clone    | Manufacturer              | Source |
|--------------------------------|----------|---------------------------|--------|
| Thyroid Transcription Factor-1 | 8G7G3/1  | Ventana Medical System    | Mouse  |
| p40                            | BC28     | Ventana Medical System    | Mouse  |
| CDX-2                          | EPR2764Y | Ventana Medical System    | Rabbit |
| Cytokeratin 7                  | SP52     | Ventana Medical System    | Rabbit |
| Cytokeratin 20                 | SP33     | Ventana Medical System    | Rabbit |
| Napsin A                       | MRQ-60   | Ventana Medical System    | Mouse  |
| pErbB3                         | Tyr1289  | Cell Signaling Technology | Rabbit |

**Supplementary Table 2: Primer sequences and assays used for *KRAS* and *EGFR* mutational analysis**

| Primer name          | Primer sequence (5'-3')/ID assay | Methods           |
|----------------------|----------------------------------|-------------------|
| KRAS_ex2_F           | CATGTTCTAAATATAGTCACA            | Sanger Sequencing |
| KRAS_ex2_R           | AACAAGATTTACCTCTATTG             | Sanger Sequencing |
| KRAS Wt G12A         | dHsaCP2000004                    | ddPCR             |
| KRAS G12A            | dHsaCP2000003                    | ddPCR             |
| KRAS Wt G12C         | dHsaCP2000008                    | ddPCR             |
| KRAS G12C            | dHsaCP2000007                    | ddPCR             |
| KRAS Wt G12D         | dHsaIS2503027                    | ddPCR             |
| KRAS G12D            | dHsaCP2000001                    | ddPCR             |
| KRAS Wt G12V         | dHsaCP2000006                    | ddPCR             |
| KRAS G12V            | dHsaCP2000005                    | ddPCR             |
| KRAS Wt G13D         | dHsaCP2000014                    | ddPCR             |
| KRAS G13D            | dHsaCP2000013                    | ddPCR             |
| EGFR_Ex18_F          | GCTGAGGTGACCCTTGTCTC             | Sanger Sequencing |
| EGFR_Ex18_R          | ACAGCTTGCAAGGACTCTGG             | Sanger Sequencing |
| EGFR_Ex19_Ext_F      | GCAATATCAGCCTTAGGTGCGGTC         | Sanger Sequencing |
| EGFR_Ex19_Ext_R      | CATAGAAAGTGAACATTTAGGATGTG       | Sanger Sequencing |
| EGFR_Ex19_Int_F      | CATGTGGCACCATCTCACA              | Sanger Sequencing |
| EGFR_Ex19_Int_R      | CCACACAGCAAAGCAGAAAC             | Sanger Sequencing |
| EGFR_Ex20_F          | CTCCCTCCAGGAAGCCTACGTGAT         | Sanger Sequencing |
| EGFR_Ex20_R          | TTTGCGATCTGCACACACCA             | Sanger Sequencing |
| EGFR_Ex21_Ext_F      | CTAACGTTCCGCCAGCCATAAGTCC        | Sanger Sequencing |
| EGFR_Ex21_Ext_R      | GCTGCGAGCTCACCCAGAAATGTCTGG      | Sanger Sequencing |
| EGFR_Ex21_Int_F      | CCTCACAGCAGGGTCTTCTC             | Sanger Sequencing |
| EGFR_Ex21_Int_R      | CCTGGTGTGAGGAAAATGCT             | Sanger Sequencing |
| EGFR L858R           | dHsaCP2000021                    | ddPCR             |
| EGFR Wt L858R        | dHsaCP2000022                    | ddPCR             |
| EGFR L747_T751del    | dHSACP2506752                    | ddPCR             |
| EGFR Wt L747_T751del | dHSACP2506753                    | ddPCR             |
| EGFR L747_S752del    | dHSACP2506758                    | ddPCR             |
| EGFR Wt L747_S752del | dHSACP2506759                    | ddPCR             |

\*wt assays are labeled with FAM, Mutant assays are labeled with HEX.

**Supplementary Table 3: Housekeeping and fusion transcripts included into the RNA-seq custom panel ID IAD107474. See Supplementary\_Table\_3****Supplementary Table 4: *NRG1*, *KRAS*, *EGFR* and *ALK* alterations in the lung adenocarcinomas study cohort. Supplementary\_Table\_4**
